1 *Full paper*

2 **Comparison of a GC-Orbitrap-MS with Parallel GC-FID Capabilities for**  
3 **Metabolomics of Human Serum**

4

5 Biswapriya B. Misra<sup>1,\*</sup>, Ekong Bassey<sup>2</sup>, Michael Olivier<sup>1</sup>

6

7 <sup>1</sup>Center for Precision Medicine, Department of Internal Medicine, Section on Molecular  
8 Medicine, Wake Forest School of Medicine, Medical Center Boulevard, Winston-Salem  
9 27157, NC USA.

10 <sup>2</sup>Thermo Fisher Scientific, 355 River Oaks Parkway, San Jose 95134, CA, USA

11

12

13

14 **\*Corresponding author:**

15 Biswapriya B. Misra, Ph.D.

16 Center for Precision Medicine

17 Department of Internal Medicine

18 Section of Molecular Medicine

19 Medical Center Boulevard

20 Winston-Salem, NC 27157

21 Email: [bmisra@wakehealth.edu](mailto:bmisra@wakehealth.edu)

22

23 *Short Title:* **GC-MS and GC-FID based metabolomics of human serum**

24

25

26

27

28

29

30

31

32

33 **Abstract**

34 Gas chromatography mass spectrometry (GC-MS) platforms for use in high throughput and  
35 discovery metabolomics have heavily relied on time of flight (ToF), and low resolution  
36 quadrupole and ion trap mass spectrometers and are typically run in electron ionization (EI)  
37 modes for matching spectral libraries. Traditionally, detectors such as flame ionization detection  
38 (FID), have also helped in identification and quantification of compounds in complex samples  
39 for diverse clinical applications, i.e., fatty acids. We probed if combination of FID in line with a  
40 high-resolution instrument like a GC-Orbitrap-MS may confer advantages over traditional mass  
41 spectrometry using EI.

42 We used a commercially available human serum sample to enhance the chemical space of serum  
43 using an advanced high resolution mass spectrometry (HR-MS) platform (QExactive Orbitrap-  
44 MS) with an FID feature for confident metabolite identification to assess the suitability of the  
45 platform for routine clinical metabolomics research. Using the EI mode, we quantified 294  
46 metabolites in human serum using GC-Orbitrap-MS. These metabolites belonged to 89  
47 biological pathways in KEGG. Following a sample split, using an in-line FID analysis, 1117  
48 peaks were quantified. Moreover, representative peaks from FID and their corresponding MS  
49 counterparts showed a good correspondence when compared for relative abundance.

50 Our study highlights the benefits of the use of a higher mass accuracy instrument for untargeted  
51 GC-MS-based metabolomics not only with EI mode but also orthogonal detection method such  
52 as FID, for robust and orthogonal quantification, in future studies addressing complex biological  
53 samples in clinical set ups.

54

55 **Keywords:** metabolomics; flame ionization detection; Orbitrap; electron ionization; GC-MS;  
56 serum; high resolution mass spectrometry.

57

58

59

60

## 61 **1. Introduction**

62 Metabolomics is the comprehensive study and systematic quantification of small molecules in  
63 the molecular weight range of 50-2000 Daltons in biological samples (cells, tissues, organs,  
64 biofluids, or whole organisms), and thus, complements efforts from other high throughput omics  
65 platforms such as genomics, transcriptomics, and proteomics as an indispensable platform.  
66 Platforms for generating metabolomics data typically include gas and liquid chromatography, or  
67 capillary electrophoresis linked with mass-spectrometry (GC-MS, LC-MS, and CE-MS), and  
68 spectroscopy approaches [such as nuclear magnetic resonance (NMR), infrared (IR), Raman] that  
69 have helped address diverse biological questions allowing to connect the genotype with  
70 molecular phenotype (1). Particularly, gas chromatography mass spectrometry (GC-MS) is very  
71 amenable to polar primary metabolites (such as sugars, amino acids, amines, sugar phosphates,  
72 or sugar alcohols) (2) and fatty acids, in addition to excellent chromatographic resolution, thus  
73 lending itself to routine quantitative metabolomic applications (2). Newer high resolution (HR)  
74 instruments such as Orbitrap mass spectrometers are capable of providing sub-ppm mass  
75 accuracy at high mass resolutions (i.e., > 60,000), and hence allow calculation of predicted  
76 molecular formulas based on the mass defect of a detected metabolite ion (3-5), and generate  
77 mass spectral data at high resolving power with mass accuracies <1 ppm. However, these HRGC-  
78 MS platforms have found limited applications till date, bearing handful applications in microbial  
79 metabolomics (6) and a recent use in non-human primate biofluid (i.e., baboon) serum  
80 metabolomics (7).

81 Most studies have used (GC)-high resolution accurate mass (HRAM) mass spectrometers only in  
82 electron ionization (EI) mode of operation. However, flame ionization detection (FID) is without  
83 a doubt the most often used gas chromatography (GC) detection method, a technology which  
84 dates back to early 1960s and finds applications ranging from analysis of hydrocarbons to fatty  
85 acids. When a full spectrum is recorded using mass selective detector (MSD) during a  
86 chromatographic run, sensitivity is often inferior in a MS detector when compared to a FID (8).  
87 A combination of GC-MS and gas chromatography-flame-ionization detection (GC-FID) also is  
88 an old idea, typically run independently and/ or in parallel, with its roots going back to the 1960s.  
89 Then the chromatograms are manually aligned and then peaks were partitioned into bins  
90 according to retention time values. Unfortunately, comparisons between chromatograms by MS

91 and by GC detectors are difficult since the results vary depending on the samples and the carbon  
92 atoms in the molecules being analyzed. FID is sensitive for compounds containing carbon, and  
93 its sensitivity is better than thermal conductivity detector (TCD). Previous studies have claimed  
94 that GC-FID is considered to be more reliable and sensitive for quantitative analysis than GC-  
95 MS, while GC-MS can provide more definite qualitative information and biomolecule  
96 identification (9). GC-FID is also considered more sensitive, more reproducible and covers a  
97 wider dynamic range when compared to GC-MS in full scan monitoring mode (10).

98 Recent studies have applied GC-FID in cataloging the human serum metabolomes as a  
99 complimentary technique to GC-MS, LC-MS and NMR (11). However, GC-FID and GC-MS or  
100 LC-MS as parallel methods have only been used in analysis of bacterial metabolites (12), for  
101 targeted fatty acid and lipid characterization in human plasma (13), fecal volatile characterization  
102 (14), and transgenic rice metabolism (15) among others. However, none of these analyses were  
103 performed using HRMS equipped with both FID and MS detectors that used the same samples at  
104 the same time. Combined TLC/GC-FID analysis when compared to GC-MS as the two methods  
105 for analysis of human serum lipids, allowed identification and quantification of only eight  
106 metabolites in common (arachidonic acid, eicosanoic acid, linoleic acid, oleic acid, palmitelaidic  
107 acid, palmitic acid, stearic acid and tetradecanoic acid) (11), suggesting significant  
108 complementarity of FID and MS analysis of the human metabolome. Previously, ethanol,  
109 methanol, and formate concentrations were measured by headspace GC-FID analysis in vitreous  
110 and blood samples collected postmortem (16).

111 As can be seen, most of these efforts used GC-FID and GC-MS as two independent approaches  
112 one after another and not in-line. To our knowledge, studies have not attempted to characterize  
113 the complex biological matrixes of clinically relevant samples such as human serum, and to  
114 show their joint application in clinical metabolomics, and rather have only been used for targeted  
115 chemical constituents such as drugs, pesticides, and organic exogenous chemicals. Our study is  
116 the first attempt to identify and quantify serum metabolites using a high mass resolution gas  
117 chromatography mass spectrometer (GC-Orbitrap-MS) with two detectors (FID and MS) on a  
118 comparative basis. The principal aims of this study were to assess the capabilities of GC-FID  
119 analysis in parallel to a GC-Orbitrap-MS analysis for quantification and identification of

120 metabolites in human serum as a test sample, in order to exploit the full capabilities of these two  
121 detectors and instrument for untargeted clinical metabolomics.

122

## 123 **2. Materials and Methods**

### 124 **2.1 Chemicals**

125 Solvents such as acetonitrile, isopropanol, and pyridine were of HPLC grade, and methoxyamine  
126 hydrochloride (MeOX), 1% TMCS in *N*-methyl-*N*-trimethylsilyl-trifluoroacetamide (MSTFA),  
127 and adonitol, were obtained from Sigma-Aldrich, St. Louis, USA.

128

### 129 **2.2 Human serum sample**

130 Human serum (Cat. No. H6914, from a male AB clotted whole blood, USA origin, sterile-  
131 filtered) was obtained from Sigma-Aldrich, St. Louis, USA.

### 132 **2.3 Serum sample extraction and derivatization for GC-MS and GC-FID analysis**

133 Serum samples (30  $\mu$ L) were subjected to sequential solvent extraction once each with 1 mL of  
134 acetonitrile: isopropanol: water (3:3:2, v/v) ratio and 500  $\mu$ L of acetonitrile: water (1:1, v/v) ratio  
135 mixtures at 4 °C(17). Adonitol (5  $\mu$ L from 10 mg/ml stock) was added to each aliquot as an  
136 internal standard prior to solvent extraction. The pooled extracts (~ 1500  $\mu$ L) from the two steps  
137 were dried under vacuum at 4 °C and parallel extractions performed on empty microcentrifuge  
138 tubes only served as extraction blanks to account for background (extraction conditions,  
139 derivatization reagents) noise and other sources of contamination (septa, liner, column, vials,  
140 handling among others). Blanks were intermittently used to see that no carryovers occurred  
141 during randomized run orders and to manually filter out contaminating chemicals from the  
142 combined list of features obtained from the blanks. Samples were then sequentially derivatized  
143 with methoxyamine hydrochloride (MeOX) and 1% TMCS in *N*-methyl-*N*-trimethylsilyl-  
144 trifluoroacetamide (MSTFA) as described elsewhere (7, 18, 19). Steps involved addition of 10  
145  $\mu$ L of MeOX (20 mg/mL) in pyridine, followed by incubation under shaking at 55 °C for 60 min  
146 followed by trimethylsilylation at 60 °C for 60 min after adding 90  $\mu$ L MSTFA as described (2,  
147 7).

148

## 149 **2.4 GC-Orbitrap-MS instrument parameters**

150 A robotic arm TriPlus™ RSH autosampler (Thermo Fisher Scientific™, Bremen, Germany)  
151 injected 1 µL of derivatized sample into a Programmable Temperature Vaporizing (PTV) injector  
152 at initial temp of 90 °C to a transfer temp of 290 °C on TRACE™ 1310 gas chromatograph  
153 (Thermo Fisher Scientific™, Austin, TX). Helium carrier gas at a flow rate of 1.6 mL/min was  
154 used for separation on a Thermo Fisher Scientific™ TG-5MS (60 m length × 0.25 mm i.d. × 0.25  
155 µm film thickness) column. The initial oven temperature was held at 90 °C for 0.5 min, followed  
156 by an initial gradient of 10 °C/min ramp rate to 250 °C, where it was held for 5 min, and a  
157 gradient of 5 °C/min ramp rate to 295 °C. The final temperature was 295 °C and was held for 35  
158 min. Eluting peaks were transferred through an auxiliary transfer temperature of 250 °C into a Q  
159 Exactive™-GC mass spectrometer (Thermo Fisher Scientific™, Bremen, Germany). The mass  
160 spectrometer has a resolving power (RP) of 120,000 full width at half maximum (FWHM) at  $m/z$   
161 200 with EI or CI capabilities. From the ion source, an AQT quadrupole is used for precursor ion  
162 isolation, which leads into the Orbitrap mass analyzer. Electron ionisation (EI) at 70 eV energy,  
163 emission current of 50 µA with an ion source temperature of 230 °C was used in all experiments.  
164 A filament delay of 5.3 min was selected to prevent excess reagents from being ionized. High  
165 resolution EI spectra were acquired using 60,000 resolution (FWHM at  $m/z$  200) with a mass  
166 range of  $m/z$  50-650.

167

## 168 **2.5 GC-FID analysis**

169 GC-FID (**Supplementary Figure S1**) analysis was accomplished on the TRACE™ 1310 gas  
170 chromatograph (Thermo Fisher Scientific™, Austin, TX). The detector temperature was set at  
171 305 °C where the ignition threshold was 0.5 Pa, airflow of 350 mL/min, hydrogen flow 35  
172 mL/min., and makeup gas 30 mL/min. All other analytic conditions including the column type  
173 and column temperature, the injection temperature, splitless injection conditions, carrier gas and  
174 the linear velocity were the same as those of GC-MS analysis.

175 For both analyses, the acquisition sequence started with blank solvent (pyridine) injections,  
176 followed by randomized lists of extraction blanks (B), reagent blanks (R), solvent (pyridine-P),  
177 and samples (S), where sequences of B, R, and P were injected at scheduled intervals for

178 monitoring shifts in retention indices (RI) as well as serving as system quality control (QC)  
179 checks.

## 180 **2.6 GC-Orbitrap-MS data processing**

181 Acquired data was processed using Thermo Fisher Scientific™ TraceFinder™ 4.1 (Thermo  
182 Fisher Scientific, Bremen, Germany) software for untargeted analysis. Initial analysis of  
183 collected spectra included baseline correction, peak filtering, quantification, assignment of a  
184 unique mass and retention indices, signal-to-noise calculation, and compound identification  
185 based on the mass spectral pattern as compared to EI spectral libraries. Spectral libraries  
186 consulted included: NIST Mass Spectral Reference Library (NIST14/2014; National Institute of  
187 Standards and Technology, USA), the Wiley Registry of Mass Spectra – 11<sup>th</sup> Edition, the MSRI  
188 spectral libraries from Golm Metabolome Database (20) available from Max-Planck-Institute for  
189 Plant Physiology, Golm, Germany (<http://csbdb.mpimp-golm.mpg.de/csbdb/gmd/gmd.html>),  
190 MassBank (21), MoNA (Mass Bank of North America, (<http://mona.fiehnlab.ucdavis.edu/>)) and a  
191 vendor supplied high resolution (HR)-MS mass spectral library for the GC-MS dataset using  
192 proprietary TraceFinder™ software (Thermo Fisher Scientific) and MS-DIAL software ver. 3.51  
193 (22) for additional searches, visualization and spectral matching. Further, to filter out noise and  
194 less confident compounds, we discarded all compounds with a CV > 30 %. Further, all *siloxane*,  
195 *halogen-derivatives*, *phthalate*, *acrylate*, and *silyloxy*, *borane*, *dioxolan*, and *silan*, *silox*, -  
196 derivative compounds were removed from the list manually. For the MS platform, metabolite  
197 annotation and assignment followed the metabolomics standards initiative (MSI) guidelines for  
198 metabolite identification (23), with Level 2 identification based on spectral database match  
199 (match factor >80%) and Level 3 identification where only compound groups were known  
200 (specific ions and RT regions of metabolites).

201

## 202 **2.7 Data sharing**

203 The raw datasets and the metadata obtained from both the platforms are deposited at the  
204 Metabolomics Workbench (Study ID: **ST001037**) which are available for download at this link:  
205 <https://bit.ly/2PIFIW9> (pending publication date).

206

## 207 **2.8 Statistical analysis**

208 Statistical processing of both GC-FID and GC-MS data sets were performed using statistical  
209 software R (Version 3.5.1) (24). Imputed, outlier removed, and scaled peak areas representative  
210 of relative metabolite amounts obtained using DeviumWeb (25) are presented. *Univariate and*  
211 *multivariate analysis:* Hierarchical clustering analysis (HCA) was performed on Pearson  
212 distances using PermutMatrix (26). The raw metabolite abundance values were Z-score  
213 normalized, and the color scale represents +2 (high) to -2 (low) abundance in the heat map.  
214 Correlations reported are Pearson correlations which were visualized as heat maps, based on Z-  
215 score normalized data ranging from +1 (positive, red), 0 (no correlation, black), and -1 (negative,  
216 green) correlation of metabolite abundance across biological and technical replicates. Partial  
217 least squared discriminant analyses (PLSDA) were performed using MetaboAnalyst 3.0 (27) and  
218 DeviumWeb (25) where the output displayed score plots to visualize the sample groups. The data  
219 were scaled with unit variance without any transformation.

220

## 221 **2.9 Pathway enrichment analysis**

222 Pathway enrichment was performed using MetaboAnalyst 3.0 ([www.Metaboanalyst.ca](http://www.Metaboanalyst.ca)) (27). For  
223 ID conversions, the Chemical Translation Service (CTS:  
224 <http://cts.fiehnlab.ucdavis.edu/conversion/batch>) was used in batch mode to convert the common  
225 chemical names into their KEGG, HMDB, Metlin, PubChem CID, and ChEBI identifiers.

226

## 227 **3. Results and Discussion**

228

### 229 **3.1 Comparison of metabolites and peaks from MS and FID detectors**

230 We previously reported on the analysis of non-human primate serum from a baboon using HR-  
231 GC-MS alone (7). Here, we expanded our metabolomics analysis to human serum, and compared  
232 two orthogonal detection techniques attached to a GC, a MS and a FID detector. Quantitation  
233 using a FID is simple, as FID is a mass-sensitive detector that provides a nearly equal molar  
234 response to the number of carbon atoms in a hydrocarbon where the detector is fast, and response  
235 is linear over a wide dynamic range ( $\sim 10^7$  to  $10^8$ ) (28). A comparison of the FID-chromatogram  
236 and total ion chromatogram (TIC) from MS analysis are provided (**Figure 1**). The extracted FID  
237 data (filtered) (**Supplementary Table S1**) and the annotated MS-data (**Supplementary Table**



238 **S2)** are provided. Furthermore, given that there was a solvent delay time used for MS detector,  
239 only peaks from 8 to 60 min. (i.e., total 52 min.) were considered for FID peak quantification as  
240 well, to only compare peaks/metabolites in affixed retention time windows. We ran five  
241 individual serum aliquots (n=5) with three technical replicates each, generating 15 runs and  
242 corresponding data files. For MS-based analysis, 2765 metabolites were detected at least once  
243 across all the samples (including blanks, reagent blanks, and solvent), which were reduced to 298  
244 compounds that passed all the quality filters described above. However, the S/N criteria used for  
245 FID and MS analysis are not comparable as they are different detection methods, and hence, the  
246 total number of confident peaks called were very different from both the analysis. For FID-  
247 analysis, about 1117 peaks were quantified with retention times across all samples (with < 50%  
248 missing values). The median and mean CVs for FID were at 73.43 and 87.90%, whereas those  
249 for MS were 43.77 and 51.44%. Thus, with stringent filtering criteria, such as retaining only  
250 compounds/ peaks with < 30% RSD, we retained 298 metabolites in the MS analysis and 83 such  
251 peaks in the FID analysis. A previous study using fatty acid methyl ester (FAME) analysis  
252 showed that 28 FAME standards tested provided similar results for the novel GC-EI-MS-SIM  
253 method and GC-EI-MS in the full scan mode, both of which were slightly worse than GC-FID  
254 analysis (29).

255 When we performed hierarchical clustering (HCA) analysis of the top 50 features (either peaks  
256 from FID or metabolites abundances from MS) from the two platforms, the results reveal a  
257 clearer separation of sample groups (blanks vs samples) for the FID analysis (**Figure 2 A, B**)  
258 when compared to those obtained from MS analysis. Similarly, a metabolite-metabolite Pearson  
259 correlation analysis for peak and metabolite abundances revealed clearer clusters (two such  
260 modules) for the FID data (**Figure 3 A, B**) as opposed to the MS data where the clusters are  
261 diffused. When performing a supervised PLS-DA analysis, the FID data explained the clusters  
262 better [cumulative score for the first two PCs (PC1, PC2) = 71%] when compared to the MS-data  
263 [cumulative score for the first two PCs (PC1, PC2) = 23%] (**Figure 3 C, D**).

264 We further evaluated the linear correspondence of the quantified compounds based on FID and  
265 MS results. We obtained good correlations for randomly handpicked compounds such as  
266 glucose, alanine, citric acid, and an unknown, as an example, with correlation scores ranging  
267 from 0.99 to 0.89, and fitting linear regression models (**Figure 4 A-D**). Nonetheless, in

268 comparative analysis of volatile compounds in virgin olive oil, it was demonstrated that good  
269 selectivity, linearity and higher upper values of the working range are the main advantages of  
270 solid-phase microextraction (SPME)-GC-FID versus low bottom values of working ranges,  
271 better sensitivity and lower limits of detection and quantification of SPME-GC-MS (30). In  
272 another study, no differences associated to particular functional groups were observed between  
273 GC-FID and GC-MS, except for the acids, for which working range is much better for GC-FID  
274 (30). Also, one-dimensional GC using FID may be sufficient to define biomarker ratios;  
275 however, if the samples are too complex, interferences from coeluting compounds will  
276 complicate the analysis (31) (Bai et al., 2018).

277

### 278 **3.2 Analysis of human serum using FID and HR MS**

279 We analyzed the HRGC-MS data from human serum for its relevance to both clinical and  
280 biological analysis. Of the 294 metabolites quantified, we obtained 56 metabolites as  
281 trimethylsilylated derivatives and 238 others that were not derivatized (**Supplementary Table**  
282 **S2**). Of these, 133 metabolites were assigned KEGG IDs belonging to various human metabolic  
283 pathways. These metabolites included S-adenosyl-L-methionine, adenosine monophosphate, S-  
284 adenosyl-L-homocysteine, glucose, alanine, lysine, formic acid, arginine, serine, tryptophan,  
285 phenylalanine, urea, 5-phosphorylribose 1-pyrophosphate, biotin, histidine, proline, citric acid,  
286 benzoic acid, valine, and threonine. The significantly higher number of metabolites detected in  
287 our current efforts, compared to our earlier analysis of a baboon serum sample (7) is attributed to  
288 a longer run time of 60 minutes as opposed to the shorter protocol of 23 minutes in the earlier  
289 study. Moreover, there are species specific metabolite differences among primate tissues (32)  
290 and biofluids. Another 16 metabolites matched KEGG IDs belonging to drugs (i.e., lisinopril,  
291 atazanavir, amisulpride, metergoline phenylmethyl ester, alfuzosin decanedioic acid, dibutyl  
292 ester, aliskiren, zopiclone, bezafibrate, sulpiride, carbachol, risperidone, ranitidine, indapamide,  
293 droperidol). The list also included 41 metabolites that were assigned a LIPIDMAPS ID. These  
294 quantified metabolites belonged to 89 various metabolic pathways (and 35 pathways with at least  
295 3 metabolites mapped onto each of them), such as methylhistidine metabolism, thiamine  
296 metabolism, glycine and serine metabolism, glucose-alanine cycle, biotin metabolism, carnitine  
297 synthesis, transfer of acetyl groups into mitochondria, urea cycle, methionine metabolism,

298 homocysteine degradation, alanine metabolism among others (**Supplementary Table S3**).  
299 Recently, GC-FID combined with precolumn derivatization with isobutyl chloroformate was  
300 used for confident determination of nucleobases guanine, adenine, cytosine, and thymine from  
301 DNA samples (33). Other studies have focused on detection of the food chemicals, i.e., caffeine  
302 in coffee grains using GC-FID as well (34). A very recent analysis of a reference material, NIST  
303 Standard Reference Material (SRM) 2378 fatty acids in frozen human serum using methods  
304 NIST-1 and NIST-2 that use GC-FID and GC-MS platforms, respectively, revealed expanded  
305 uncertainties for 12 fatty acids and reference values with expanded uncertainties for an additional  
306 18 fatty acids (35).

307 Conversely, one cannot map peaks obtained from FID analysis for pathway mapping analysis or  
308 enrichment analysis, without access to individual chemical/metabolite standards. However, as  
309 mentioned in the previous section, the robust quantification obtained from FID data is  
310 advantageous for better quantification when compared to MS-based analysis only. Given that the  
311 past FID analysis efforts relied on FAME analysis for metabolite profiling, future analysis can  
312 potentially expand on this detection method to use such integrated workflows as the one  
313 described in this manuscript. However, robust software tools and analysis workflows that can  
314 seamlessly integrate FID and MS-data in real time or offline, are clearly missing.

315 Nonetheless, both detectors represent a flexible tool for explorative studies and, if supported by  
316 appropriate data-processing tools, would appear to be useful in any metabolic profiling study, as  
317 was shown using 28 standard compounds including 17 amino acid standards and in CSF samples  
318 with simultaneous acquisition with both MS and FID detectors (36). It was also reported that  
319 limit of detection (LOD) and limit of quantification (LOQ) are significantly lower for GC-  
320 APCI/ToF-MS than for GC-FID. Moreover, the quantitative response of the FID detector is free  
321 from ionization bias and those biases introduced by the type of mass analyzer or the instrumental  
322 design of a mass spectrometer. Consequently, FID gives a better overall quantitative  
323 representation in complex biological samples where traditional MS analysis often is challenged  
324 by ion interference effects (36). Further, in a comparison of the non-esterified or free fatty acids  
325 quantitative results between the TLC/GC-FID and the GC-MS platforms demonstrated that the  
326 GC-MS concentrations of palmitic acid, vaccinic acid, oleic acid, linoleic acid, dihomo- $\gamma$ -  
327 linolenic acid and docosapenta-(4,7,10,13,16)-enoic acid are generally higher than those

328 measured by TLC/GC-FID (11) indicating higher sensitivity and detector-bias as far as MS is  
329 concerned.

330 Our study suffers from several limitations that we clearly recognize, esp. with lower sample size  
331 for this proof-of-concept study to demonstrate the applicability of the dual-detector platform for  
332 clinical metabolomics studies. Secondly, there are other biofluids such as plasma, saliva and  
333 even tissue or cell samples from humans that could be informative for further screening for  
334 comparison of those datasets on this new platform. Other complimentary approaches such as  
335 high resolution LC-MS/MS or even other detectors such as thermal conductivity detector (TCD)  
336 and electron capture detector (ECD) among a host of others would be worth exploring.

337

#### 338 **4. Conclusions**

339 We demonstrated the advantages of a combined GC-FID and HRGC-MS analyses when  
340 compared to results obtained from the individual platforms, and how this can boost analytical  
341 biochemistry and downstream metabolomics applications. It remains a challenge, like any other  
342 untargeted metabolomics platform, to consolidate and align features detected using FID and MS  
343 for reliable quantification. We also propose that such instruments which lend the capabilities of  
344 detectors that work on different principles would be helpful for correct identification of  
345 compounds, especially when standards are available.

346

#### 347 **Author contributions**

348 BBM, EB, and MO designed the research; BBM and EB performed the experiments; MO  
349 provided essential reagents and materials, BBM and EB analyzed the data, BBM and MO wrote  
350 the manuscript, and BBM interpreted the data and has the primary responsibility for the final  
351 content and edits. All the authors have accepted responsibility for the entire content of this  
352 submitted manuscript and approved submission.

#### 353 **Human and Animal Rights and Informed Consent**

354 This article does not contain any studies with human or animal subjects performed by any of the  
355 authors, but only a de-identified commercially available human serum sample.

### 356 **Research funding**

357 None declared.

358

### 359 **Employment or leadership**

360 None declared.

361

### 362 **Honorarium**

363 None declared.

364

### 365 **Conflict of interest**

366 The authors wish to confirm that there are no known conflicts of interest associated with this  
367 publication and there has been no significant financial support for this work that could have  
368 influenced its outcome.

### 369 **References**

- 370 1. Fiehn O. Metabolomics-the link between genotypes and phenotypes. *Plant Mol Biol.*  
371 2002;48(1-2):155-71.
- 372 2. Fiehn O. Metabolomics by gas chromatography–mass spectrometry: Combined targeted  
373 and untargeted profiling. *Current protocols in molecular biology.* 2016;114(1):30.4. 1-.4. 2.
- 374 3. Peterson AC, McAlister GC, Quarmby ST, Griep-Raming J, Coon JJ. Development and  
375 characterization of a GC-enabled QLT-Orbitrap for high-resolution and high-mass accuracy  
376 GC/MS. *Anal Chem.* 2010;82(20):8618-28.

- 377 4. Peterson AC, Hauschild JP, Quarmby ST, Krumwiede D, Lange O, Lemke RA, et al.  
378 Development of a GC/Quadrupole-Orbitrap mass spectrometer, part I: design and  
379 characterization. *Anal Chem.* 2014;86(20):10036-43.
- 380 5. Peterson AC, Balloon AJ, Westphall MS, Coon JJ. Development of a GC/Quadrupole-  
381 Orbitrap mass spectrometer, part II: new approaches for discovery metabolomics. *Anal Chem.*  
382 2014;86(20):10044-51.
- 383 6. Weidt S, Haggarty J, Kean R, Cojocariu CI, Silcock PJ, Rajendran R, et al. A novel  
384 targeted/untargeted GC-Orbitrap metabolomics methodology applied to *Candida albicans* and  
385 *Staphylococcus aureus* biofilms. *Metabolomics.* 2016;12(12).
- 386 7. Misra BB, Bassey E, Bishop AC, Kusel DT, Cox LA, Olivier M. High Resolution  
387 GC/MS Metabolomics of Non-Human Primate Serum. *Rapid Commun Mass Spectrom.* 2018.
- 388 8. Vekey K. Mass spectrometry and mass-selective detection in chromatography. *Journal of*  
389 *Chromatography A.* 2001;921(2):227-36.
- 390 9. Ligor M, Buszewski B. The comparison of solid phase microextraction-GC and static  
391 headspace-GC for determination of solvent residues in vegetable oils. *J Sep Sci.* 2008;31(2):364-  
392 71.
- 393 10. Fancy SA, Beckonert O, Darbon G, Yabsley W, Walley R, Baker D, et al. Gas  
394 chromatography/flame ionisation detection mass spectrometry for the detection of endogenous  
395 urine metabolites for metabonomic studies and its, use as a complementary tool to nuclear  
396 magnetic resonance spectroscopy. *Rapid Communications in Mass Spectrometry.*  
397 2006;20(15):2271-80.
- 398 11. Psychogios N, Hau DD, Peng J, Guo AC, Mandal R, Bouatra S, et al. The Human Serum  
399 Metabolome. *Plos One.* 2011;6(2).
- 400 12. Tian J, Shi CY, Gao P, Yuan KL, Yang DW, Lu X, et al. Phenotype differentiation of  
401 three *E-coli* strains by GC-FID and GC-MS based metabolomics. *J Chromatogr B.*  
402 2008;871(2):220-6.
- 403 13. Muller DC, Degen C, Scherer G, Jahreis G, Niessner R, Scherer M. Metabolomics using  
404 GC-TOF-MS followed by subsequent GC-FID and HILIC-MS/MS analysis revealed  
405 significantly altered fatty acid and phospholipid species profiles in plasma of smokers. *J*  
406 *Chromatogr B.* 2014;966:117-26.

- 407 14. Dixon E, Clubb C, Pittman S, Ammann L, Rasheed Z, Kazmi N, et al. Solid-Phase  
408 Microextraction and the Human Fecal VOC Metabolome. *Plos One*. 2011;6(4).
- 409 15. Zhou J, Ma CF, Xu HL, Yuan KL, Lu X, Zhu Z, et al. Metabolic profiling of transgenic  
410 rice with cryIAc and sck genes: An evaluation of unintended effects at metabolic level by using  
411 GC-FID and GC-MS. *J Chromatogr B*. 2009;877(8-9):725-32.
- 412 16. Ghorbani H, Nezami A, Sheikholeslami B, Hedjazi A, Ahmadimanesh M. Simultaneous  
413 measurement of formic acid, methanol and ethanol in vitreous and blood samples of postmortem  
414 by headspace GC-FID. *J Occup Med Toxicol*. 2018;13.
- 415 17. Fiehn O, Wohlgemuth G, Scholz M, Kind T, Lee DY, Lu Y, et al. Quality control for  
416 plant metabolomics: reporting MSI-compliant studies. *The Plant journal : for cell and molecular*  
417 *biology*. 2008;53(4):691-704.
- 418 18. Lisec J, Schauer N, Kopka J, Willmitzer L, Fernie AR. Gas chromatography mass  
419 spectrometry-based metabolite profiling in plants. *Nature protocols*. 2006;1(1):387-96.
- 420 19. Misra BB, Upadhayay RP, Cox LA, Olivier M. Optimized GC-MS metabolomics for the  
421 analysis of kidney tissue metabolites. *Metabolomics*. 2018;14(6).
- 422 20. Kopka J, Schauer N, Krueger S, Birkemeyer C, Usadel B, Bergmuller E, et al.  
423 GMD@CSB.DB: the Golm Metabolome Database. *Bioinformatics*. 2005;21(8):1635-8.
- 424 21. Horai H, Arita M, Kanaya S, Nihei Y, Ikeda T, Suwa K, et al. MassBank: a public  
425 repository for sharing mass spectral data for life sciences. *Journal of mass spectrometry : JMS*.  
426 2010;45(7):703-14.
- 427 22. Tsugawa H, Cajka T, Kind T, Ma Y, Higgins B, Ikeda K, et al. MS-DIAL: data-  
428 independent MS/MS deconvolution for comprehensive metabolome analysis. *Nature methods*.  
429 2015;12(6):523.
- 430 23. Sumner LW, Amberg A, Barrett D, Beale MH, Beger R, Daykin CA, et al. Proposed  
431 minimum reporting standards for chemical analysis Chemical Analysis Working Group (CAWG)  
432 Metabolomics Standards Initiative (MSI). *Metabolomics : Official journal of the Metabolomic*  
433 *Society*. 2007;3(3):211-21.
- 434 24. Team RC. R: A language and environment for statistical computing [Internet]. Vienna,  
435 Austria: R Foundation for Statistical Computing; 2015. 2015.
- 436 25. Grapov D. DeviumWeb: Dynamic Multivariate Data Analysis and Visualization  
437 Platform. 2014.

- 438 26. Caraux G, Pinloche S. PermutMatrix: a graphical environment to arrange gene expression  
439 profiles in optimal linear order. *Bioinformatics*. 2005;21(7):1280-1.
- 440 27. Xia J, Sinelnikov IV, Han B, Wishart DS. MetaboAnalyst 3.0—making metabolomics  
441 more meaningful. *Nucleic acids research*. 2015;43(W1):W251-W7.
- 442 28. Walters CC, Wang FC, Higgins MB, Madincea ME. Universal biomarker analysis using  
443 GCxGC with dual FID and ToF-MS (EI/FI) detection. *Org Geochem*. 2018;115:57-66.
- 444 29. Thurnhofer S, Vetter W. A gas chromatography/electron ionization-mass spectrometry-  
445 selected ion monitoring method for determining the fatty acid pattern in food after formation of  
446 fatty acid methyl esters. *J Agr Food Chem*. 2005;53(23):8896-903.
- 447 30. Aparicio-Ruiz RA, Garcia-Gonzalez DLG, Morales MT, Lobo-Prieto AL, Romero I.  
448 Comparison of two analytical methods validated for the determination of volatile compounds in  
449 virgin olive oil: GC-FID vs GC-MS. *Talanta*. 2018;187:133-41.
- 450 31. Bai L, Smuts J, Schenk J, Cochran J, Schug KA. Comparison of GC-VUV, GC-FID, and  
451 comprehensive two-dimensional GC-MS for the characterization of weathered and unweathered  
452 diesel fuels. *Fuel*. 2018;214:521-7.
- 453 32. Blekhman R, Perry GH, Shahbaz S, Fiehn O, Clark AG, Gilad Y. Comparative  
454 metabolomics in primates reveals the effects of diet and gene regulatory variation on metabolic  
455 divergence. *Scientific Reports*. 2014;4.
- 456 33. Brohi ROZZ, Khuhawar MY, Khuhawar TMJ. GC-FID determination of nucleobases  
457 guanine, adenine, cytosine, and thymine from DNA by precolumn derivatization with isobutyl  
458 chloroformate. *Journal of Analytical Science Technology*. 2016;7(1):10.
- 459 34. Pasiás IN, Kiriakou I, Proestos C. Development of a Rapid Method for the Determination  
460 of Caffeine in Coffee Grains by GC-FID-A Fully Validated Approach. *Antioxidants-Basel*.  
461 2017;6(3).
- 462 35. Benner BA, Schantz MM, Powers CD, Schleicher RL, Camara JE, Sharpless KE, et al.  
463 Standard Reference Material (SRM) 2378 fatty acids in frozen human serum. Certification of a  
464 clinical SRM based on endogenous supplementation of polyunsaturated fatty acids.  
465 2018;410(9):2321-9.
- 466 36. Pacchiarotta T, Nevedomskaya E, Carrasco-Pancorbo A, Deelder AM, Mayboroda OA.  
467 Evaluation of GC-APCI/MS and GC-FID as a complementary platform. *Journal of biomolecular*  
468 *techniques: JBT*. 2010;21(4):205.



469 **Figure Legends**

470

471 **Figure 1. Comparison of chromatograms for human serum sample and representative HR-**  
472 **GC-MS spectra.** Chromatograms derived from FID analysis, and a total ion chromatogram  
473 obtained from MS analysis, and XIC (m/z 353.17774; unknown) at 5 ppm accuracy are shown.  
474 The HRGC-EI-MS spectra of six representative compounds are (A) 2-deoxytetronic acid, (B)  
475 methionine, (C) glutamic acid, (D) phenylalanine, (E) lauric acid, and (F) aminomalonic acid.

476 **Figure 2. A two-way hierarchical clustering heat map of the serum metabolome (top 50**  
477 **peaks as obtained from PLS-DA analysis) data for (A) MS detector and (B) FID detector.**  
478 Each column displays the metabolic pattern of individual samples (extraction blanks, solvents,  
479 reagent blanks, and samples). Amount of each peak in individual samples is expressed as relative  
480 value obtained by Z-normalization and is represented by the color scheme, in which red and blue  
481 indicate high and low concentrations of metabolites, respectively. Rows: samples; Columns:  
482 metabolites.

483 **Figure 3. Metabolite-metabolite Pearson correlation map for peak areas for (A) MS**  
484 **analysis and (B) FID-detected peaks.** Amount of each peak in individual samples is expressed  
485 as relative value obtained by Z-normalization and is represented by the color scheme, in which  
486 red and blue indicate high and low values for respectively, for peaks (FID) and metabolites  
487 (MS). Supervised PLS-DA analysis for (C) MS analyzed compounds and (D) FID-detected  
488 peaks.

489 **Figure 4. Scatter plots (fitting linear regression models) for FID (x-axis) and MS data (y-**  
490 **axis) for showing linearity in their response factors for all the samples.** (A) Glucose  
491 [Correlation coefficient (r): 0.9999; Sample size: 13; Intercept (a): -363496920.727; Slope (b):  
492 1.08; Regression line equation:  $y=1.08x-363496920.727$ ], (B) Alanine (Correlation coefficient  
493 (r): 0.958; Sample size 15, Intercept (a): 65761895.608, Slope (b): 0.232, Regression line  
494 equation:  $y=65761895.608+0.232x$ ], (C) Citric acid [Correlation coefficient (r): 0.993; Intercept  
495 (a): 229891680.564, Slope (b): 2.059, Regression line equation:  $y=229891680.564+2.059x$ ] (D)  
496 Unknown (Correlation coefficient (r): 0.8954) ; Sample size 15; Intercept (a): -37477621.483;  
497 Slope (b): 13462.916, Regression line equation:  $y=13462.916x-37477621.483$ ].

498 **Supplementary Table S1.** Peak lists obtained for GC-FID analysis.

499 **Supplementary Table S2.** List of metabolites captured using MS data.

500 **Supplementary Table S3.** Pathway enrichment analysis for the MS quantified metabolites.

501 **Supplementary Figure S1.** The GC-FID detector (Thermo Fisher Scientific).

502

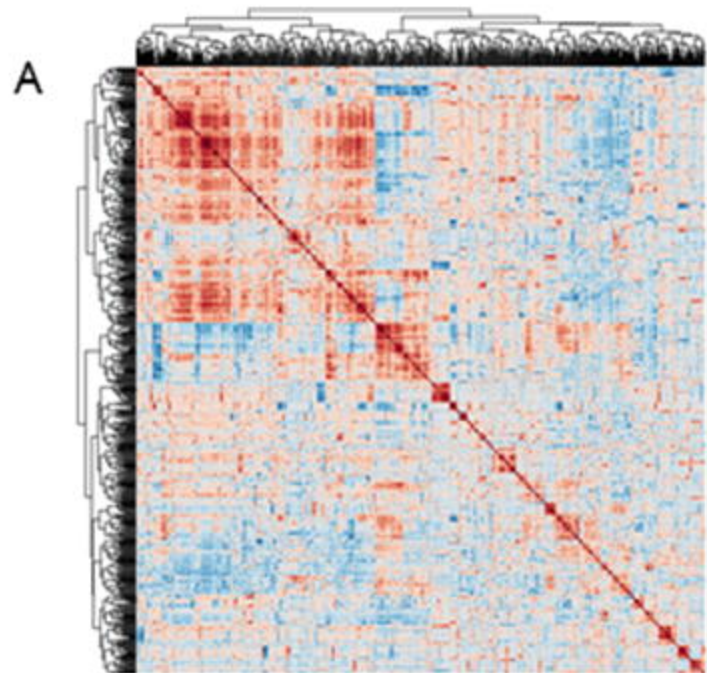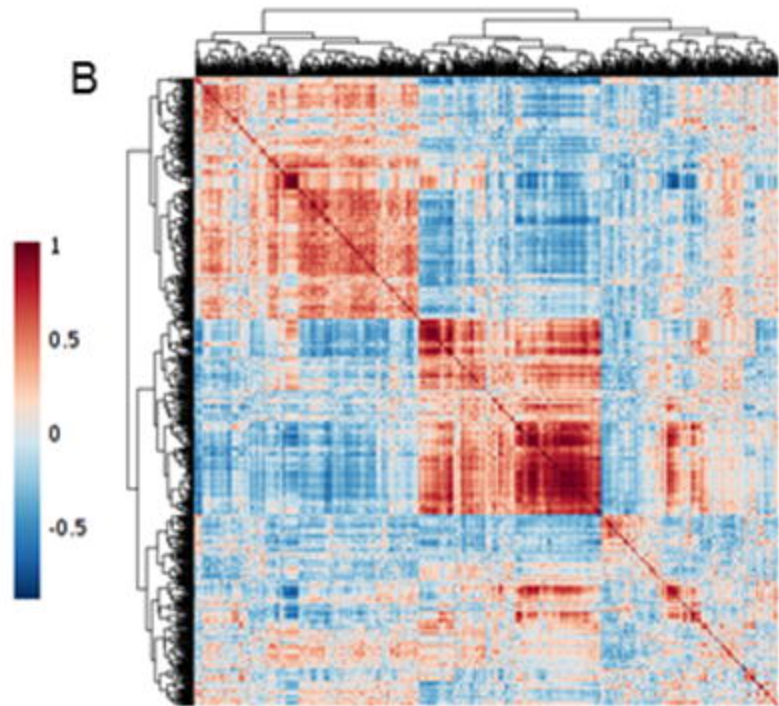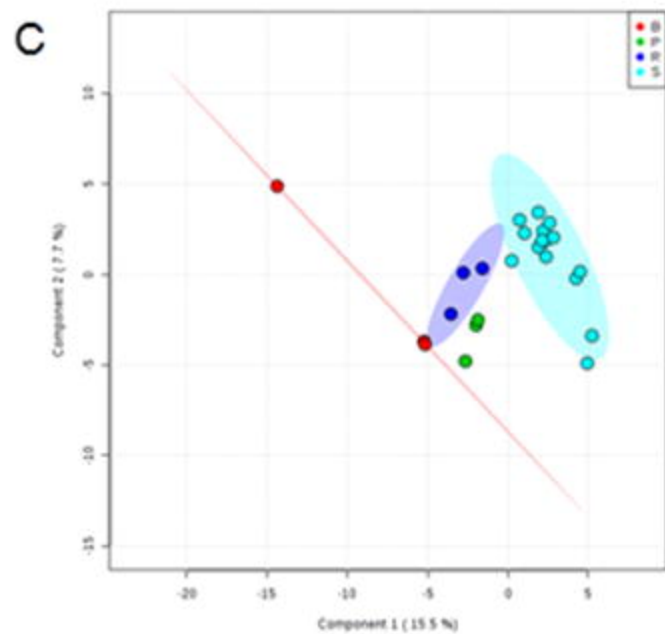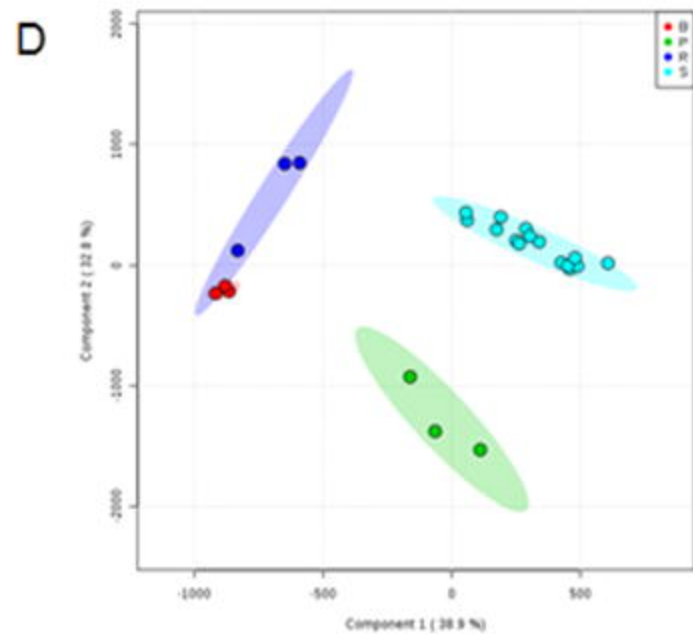

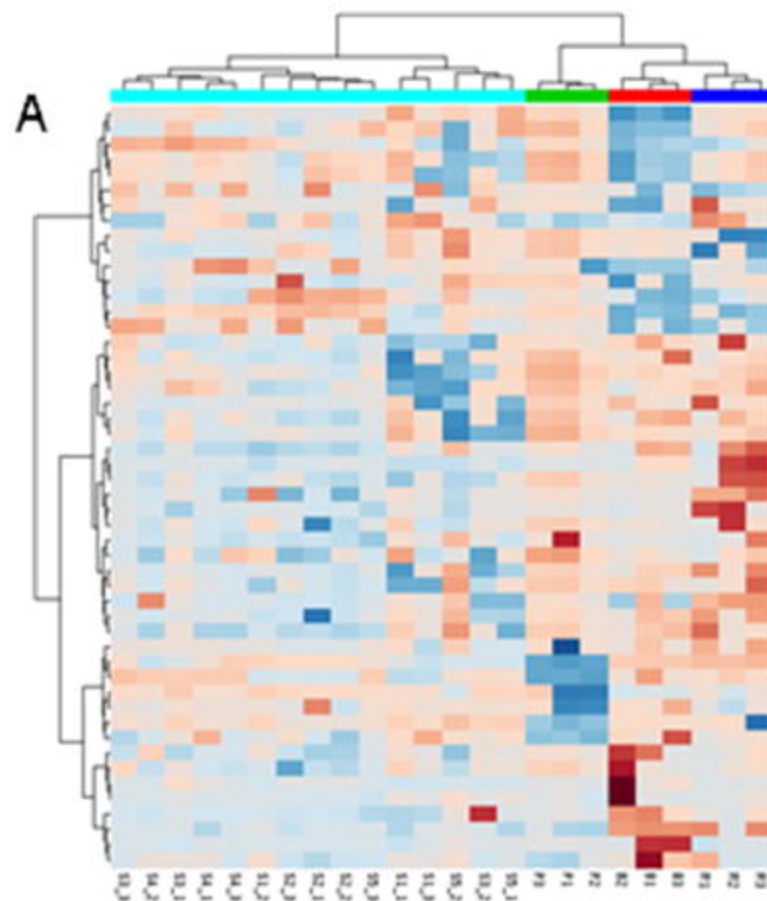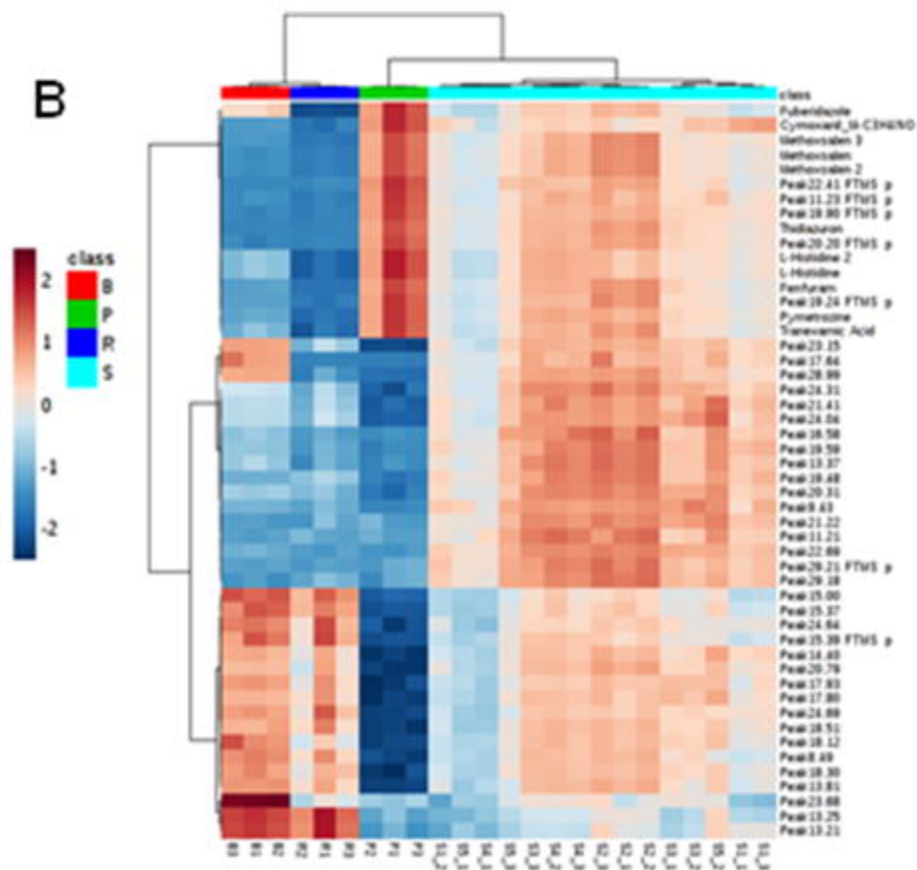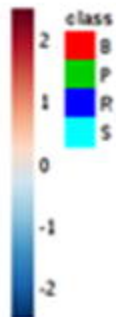

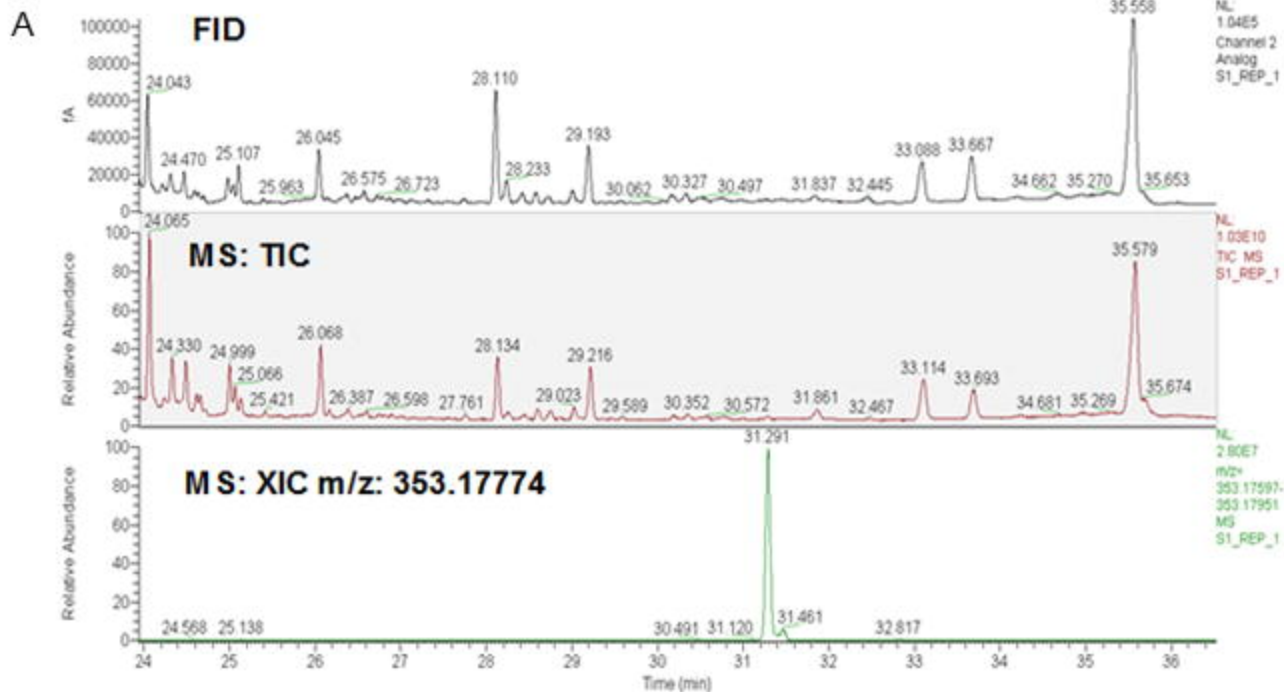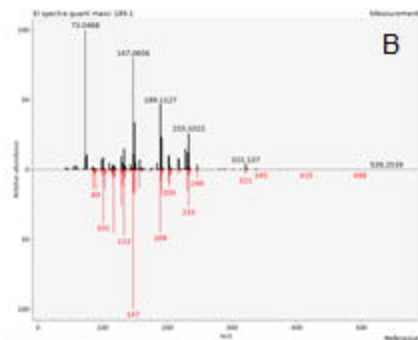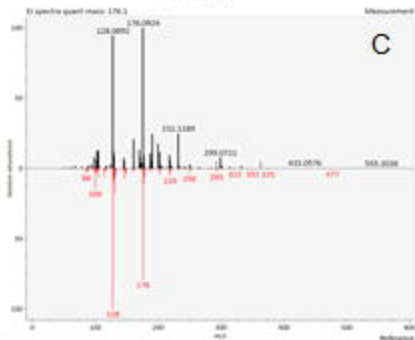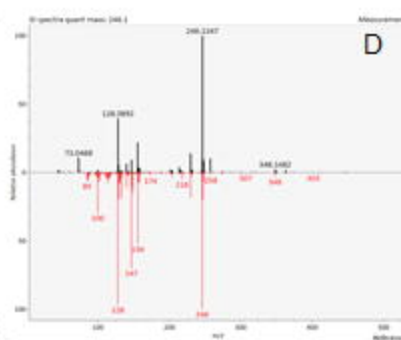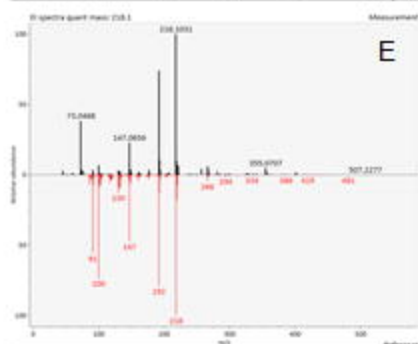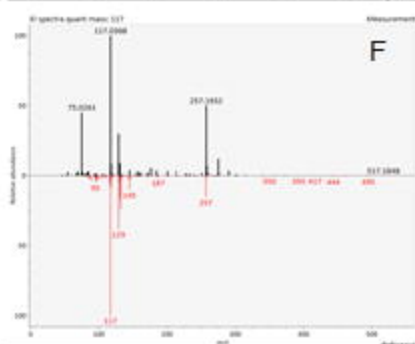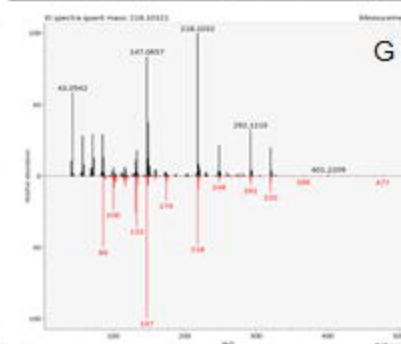

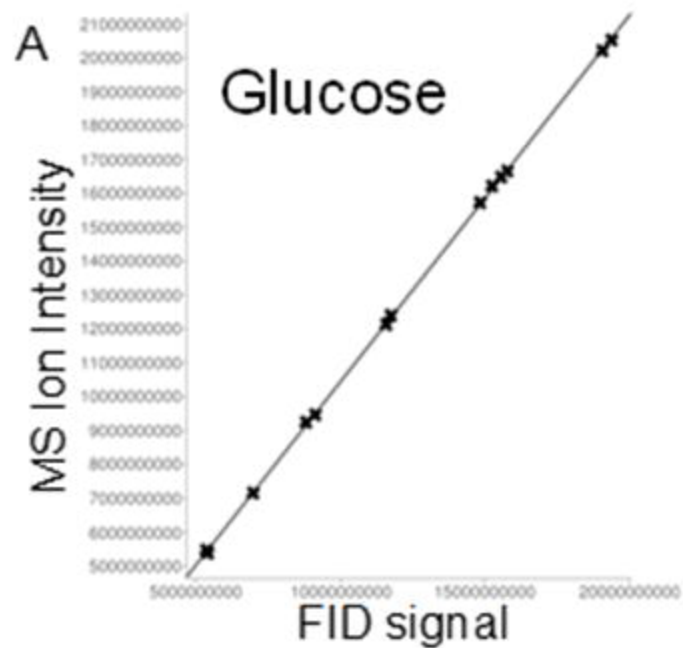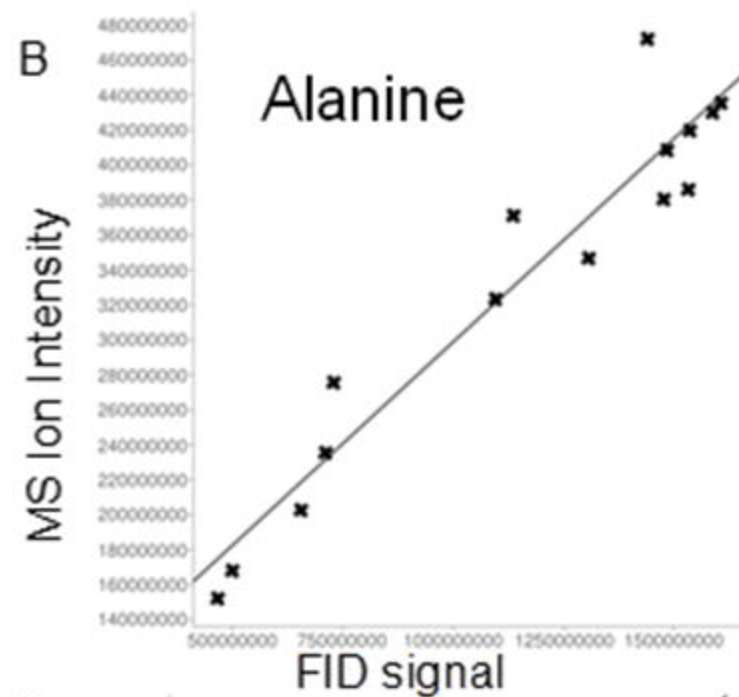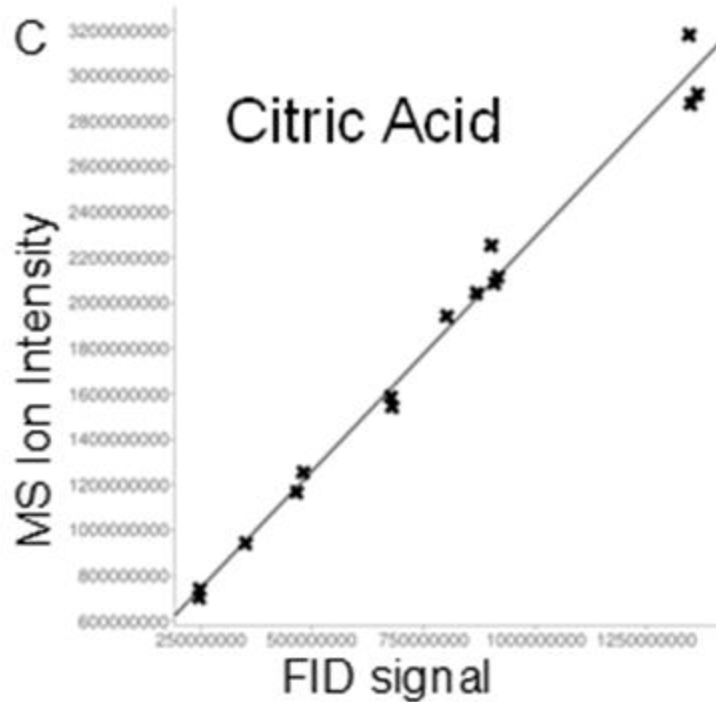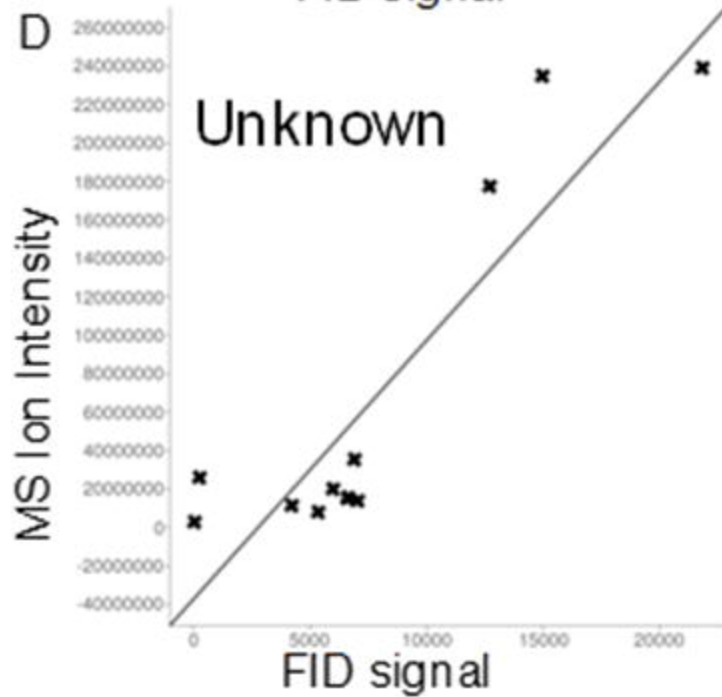

Source: https://www.biorxiv.org/content/10.1101/740795v1.full.pdf
